# Supplementary material for: Ultraporous superhydrophobic gas-permeable nano-layers by scalable solvent-free one-step self-assembly
Source: Royal Society of Chemistry journal article supplement (doi:10.1039/c5nr09000h), 2016-01-01
Supplement: c5nr09000h1.pdf [file c5nr09000h1.pdf]

## **Supporting Information**

# **Ultraporous Superhydrophobic Gas-Permeable Nano-Layers by Scalable Solvent-Free One-Step Self-Assembly**

Guanyu Liu,<sup>[a]</sup> William S. Y. Wong,<sup>[a]</sup> Noushin Nasiri<sup>[a]</sup> and Antonio Tricoli<sup>[a]\*</sup>

<sup>[a]</sup>Nanotechnology Research Laboratory, Research School of Engineering, College of Engineering and  
Computer Science, The Australian National University, Canberra, 2001 Australia.

\*Corresponding author: antonio.tricoli@anu.edu.au

Table S1 Precursors and synthesis parameters of Mn<sub>3</sub>O<sub>4</sub>, TiO<sub>2</sub>, SiO<sub>2</sub> and ZnO nano-layers.

| Metal oxide                    | Solute                                                 | Solvent                                                    | Metal-atom concentration (mol L <sup>-1</sup> ) | L <sub>R</sub> (ml/min) | O <sub>2-ΔP</sub> (L/min) | ΔP (bar) | HAB (cm) | Deposition time (min) |
|--------------------------------|--------------------------------------------------------|------------------------------------------------------------|-------------------------------------------------|-------------------------|---------------------------|----------|----------|-----------------------|
| Mn <sub>3</sub> O <sub>4</sub> | Manganese(III) acetylacetonate                         | Acetonitrile & 2-ethylhexanoic acid (1:1 volumetric ratio) | 0.2                                             | 4                       | 5                         | 2        | 17       | 3                     |
| TiO <sub>2</sub>               | Titanium isopropoxide & acetylacetone (1:4 mole ratio) | Acetonitrile & 2-ethylhexanoic acid (1:1 volumetric ratio) | 0.2                                             | 4                       | 5                         | 2        | 17       | 3                     |
| SiO <sub>2</sub>               | Hexamethyldisiloxane & acetylacetone (1:3 mole ratio)  | Acetonitrile & 2-ethylhexanoic acid (1:1 volumetric ratio) | 0.2                                             | 4                       | 5                         | 2        | 17       | 3                     |
| ZnO                            | Zinc naphthenate                                       | Xylene                                                     | 0.3                                             | 4                       | 3                         | 2        | 20       | 3                     |
|                                |                                                        |                                                            |                                                 |                         | 5                         | 3        |          |                       |

L<sub>R</sub>: precursor feed rate, O<sub>2-ΔP</sub>: dispersion O<sub>2</sub>, ΔP: atomization pressure, HAB: height above burner.

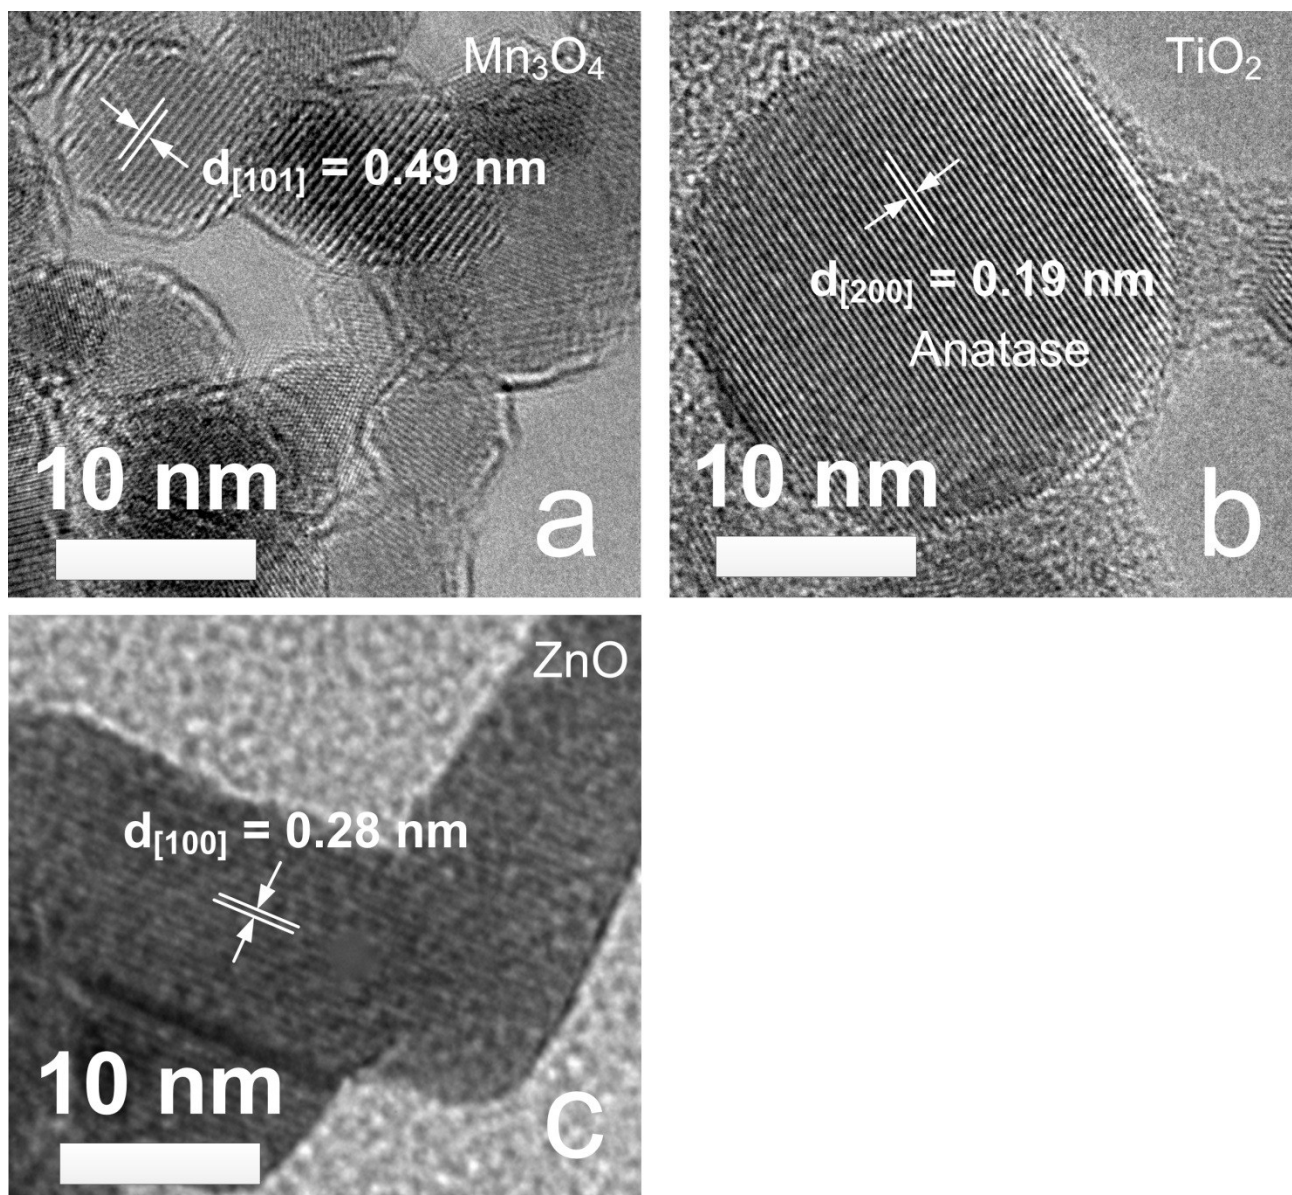

**Figure S1.** High-resolution TEM images of as-synthesized (a)  $\text{Mn}_3\text{O}_4$ , (b)  $\text{TiO}_2$  and (c)  $\text{ZnO}$  nanoparticles.

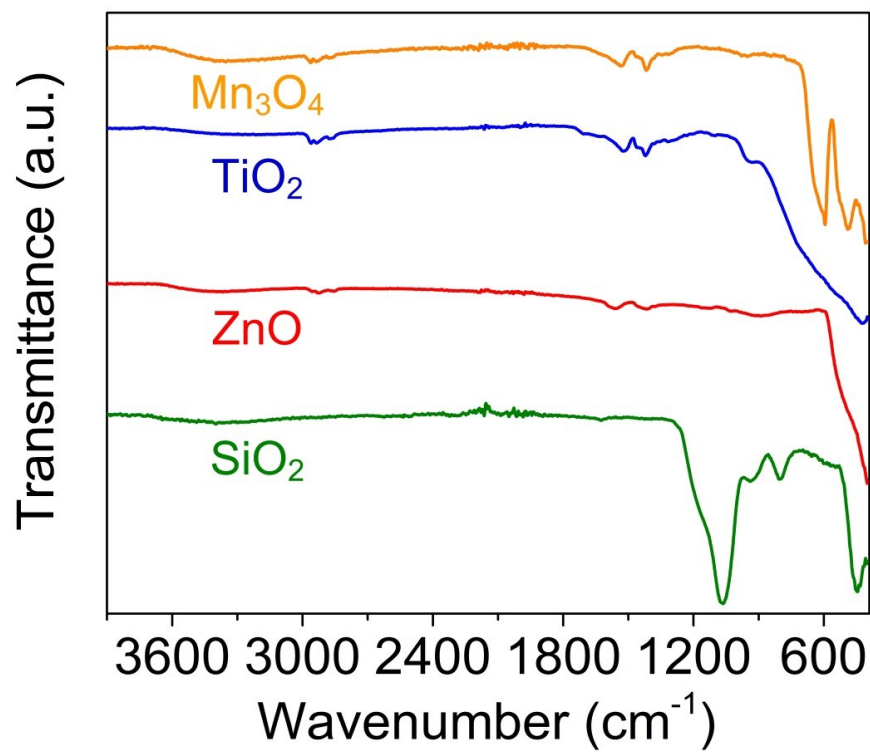

**Figure S2.** FTIR spectra of the as-synthesized nanoparticles.

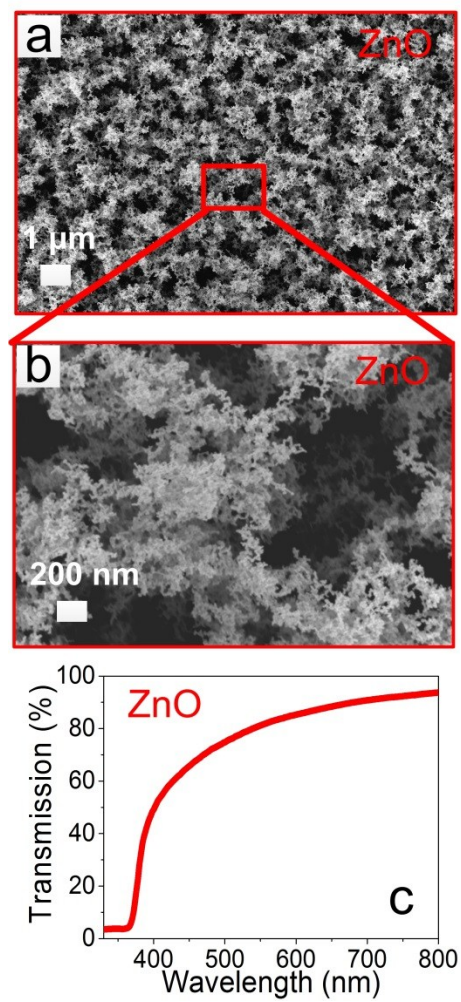

**Figure S3.** (a,b) SEM images and (c) UV-Vis transmission spectrum of ZnO nano-layers.

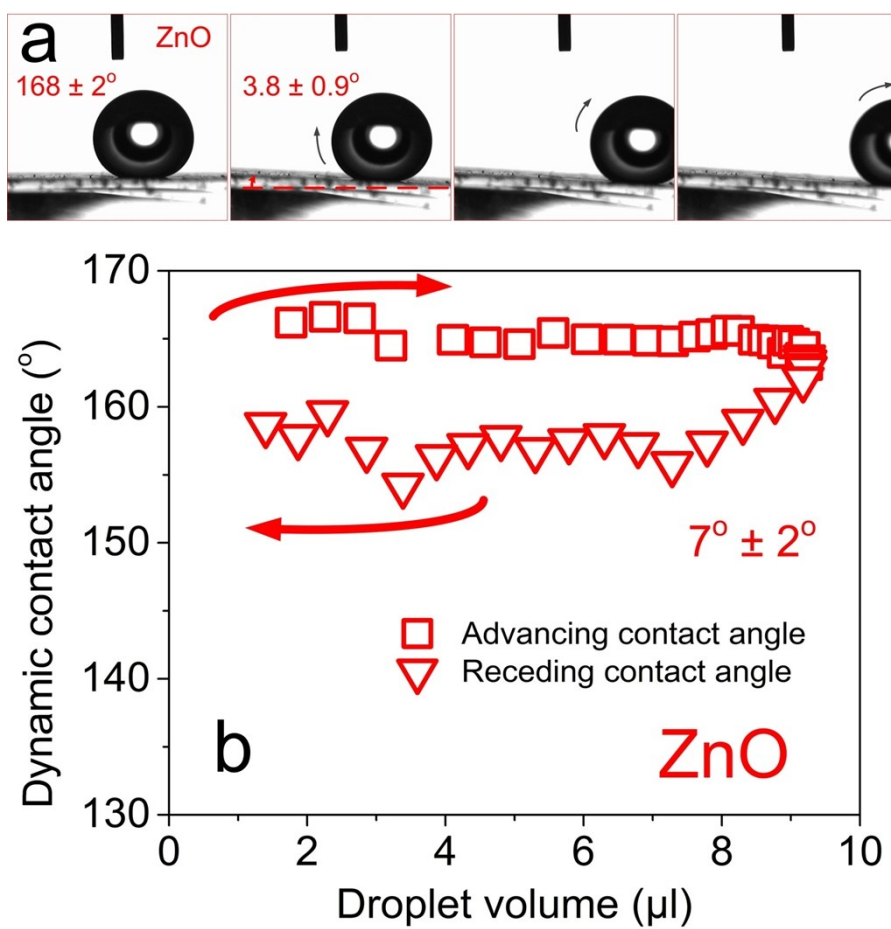

**Figure S4.** (a) Contact angle and sliding angle measurements and (b) Dynamic contact angle measurements of ZnO nano-layers (oxygen dispersion rate is  $5 \text{ L min}^{-1}$ ).

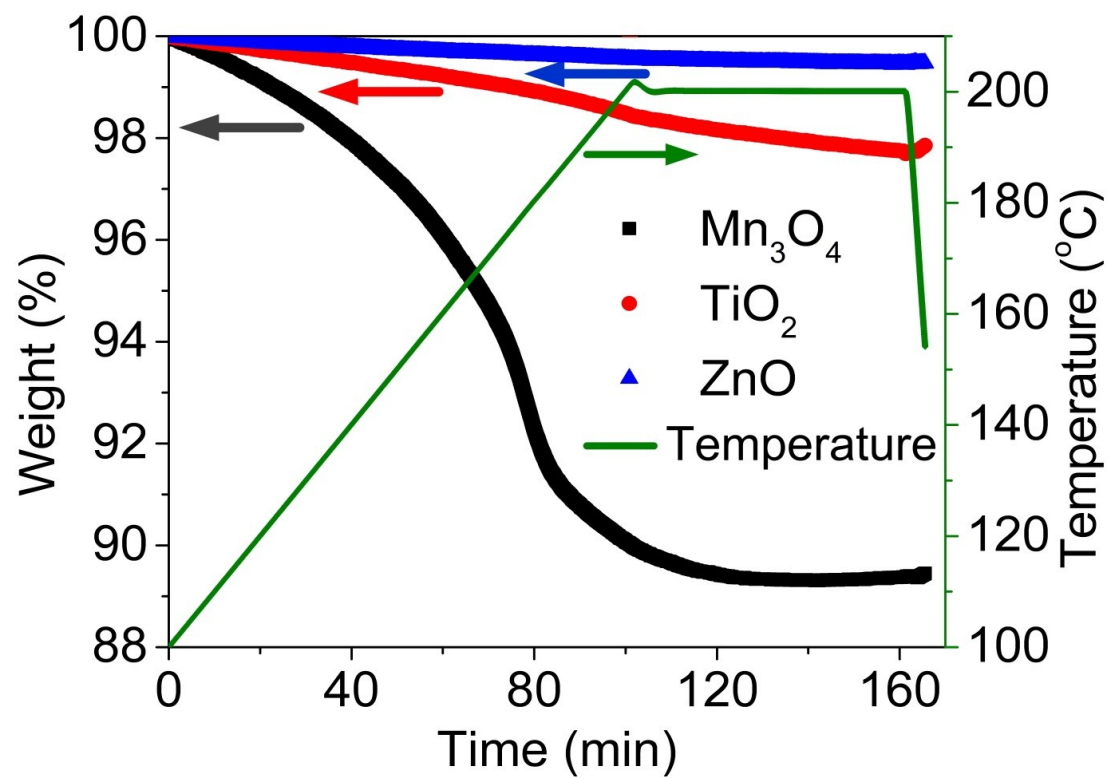

**Figure S5.** TGA of as-synthesized  $\text{Mn}_3\text{O}_4$ ,  $\text{TiO}_2$  and  $\text{ZnO}$  nanoparticles.

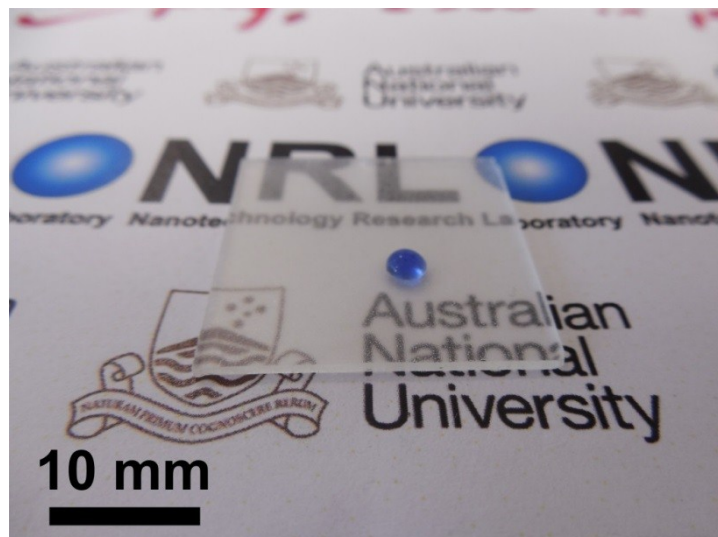

**Figure S6.** A photograph of the water droplet on glass slide with polyurethane-acrylic based binder coating before superhydrophobic nanoparticle deposition.



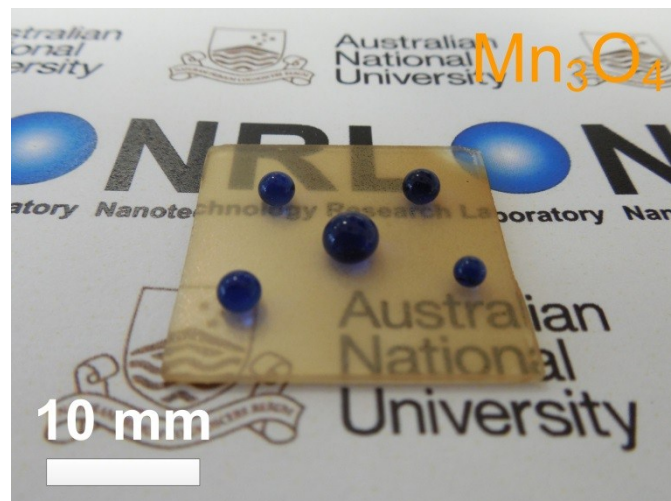

**Figure S7.** Photograph of the superhydrophobic  $\text{Mn}_3\text{O}_4$  nano-layer on the glass slide.

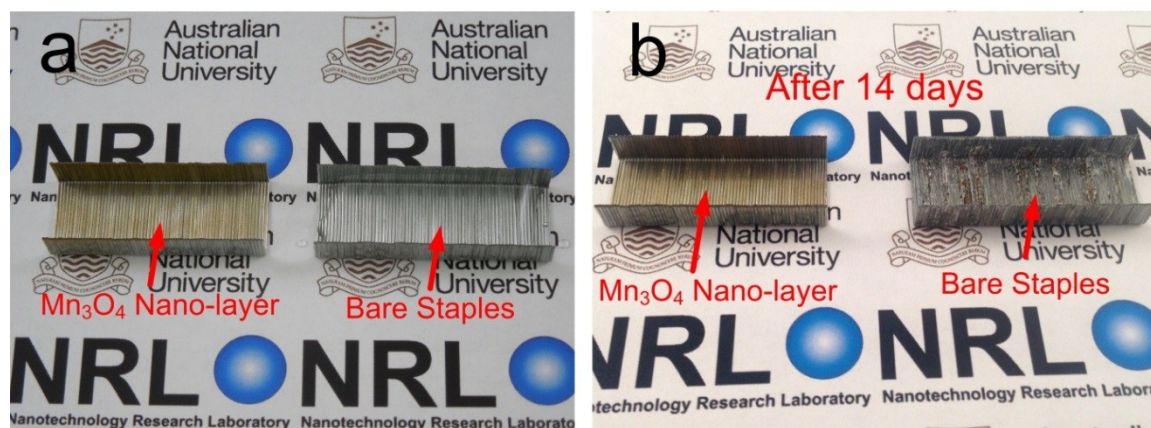

**Figure S8.** Anticorrosion properties of the ultraporous superhydrophobic  $\text{Mn}_3\text{O}_4$  layers deposited on iron staples (a) before and (b) after repeated wetting with a salt solution (35 g  $\text{L}^{-1}$  NaCl in deionized water).

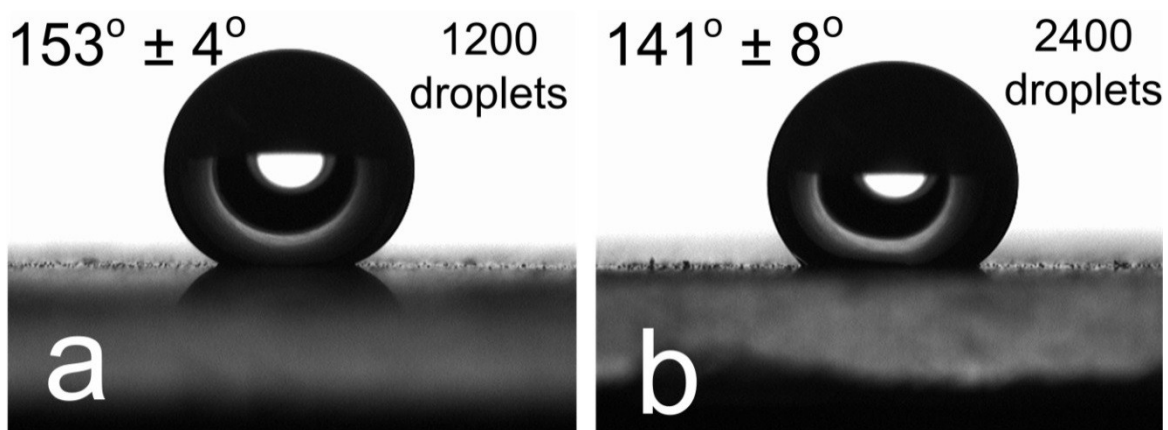

**Figure S9.** Contact angle measurements of TiO<sub>2</sub> nano-layers after stability test with (a) 1200 and (b) 2400 sequential droplets.

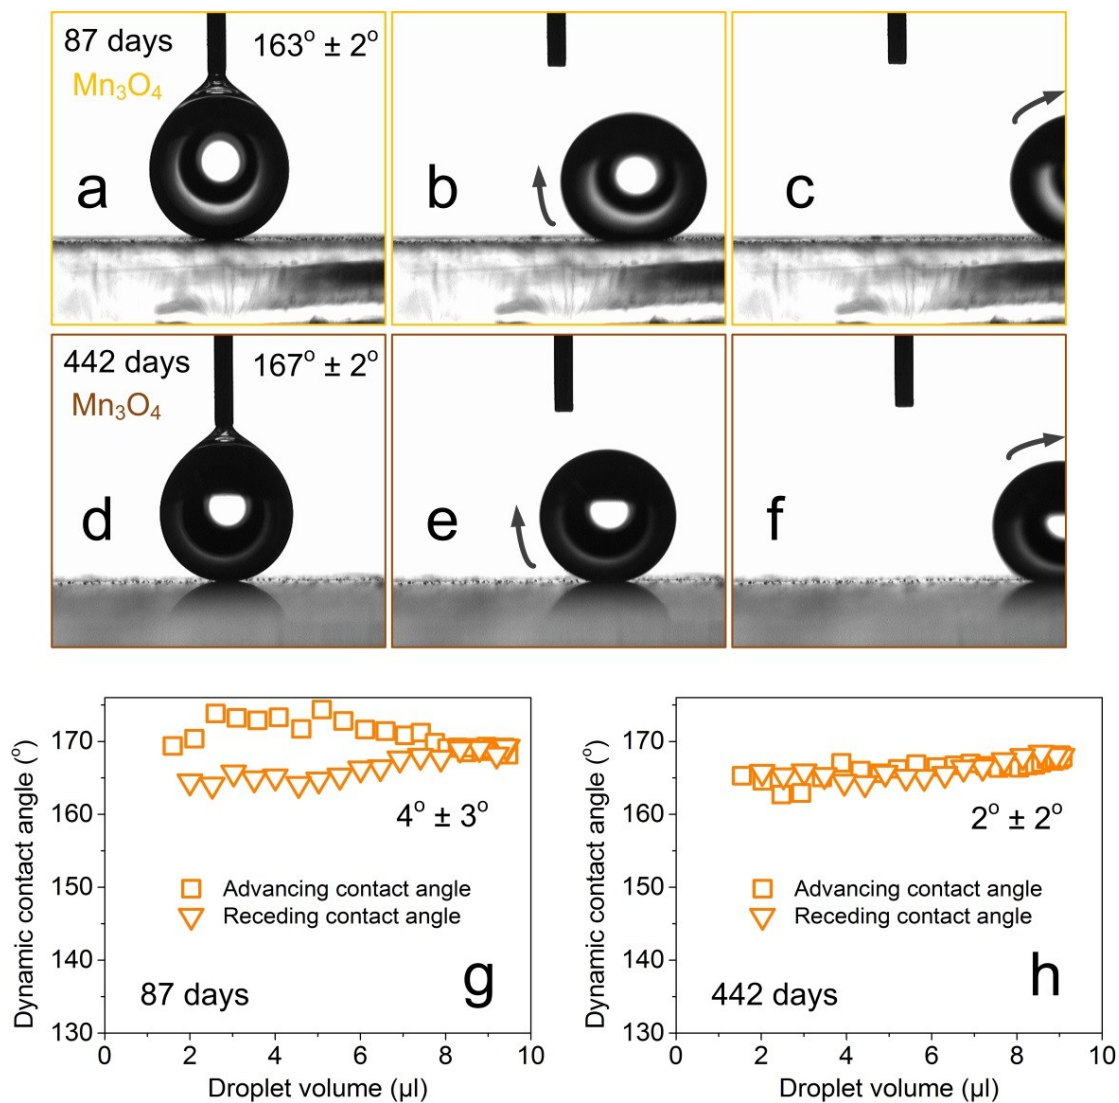

**Figure S10.** Contact angle characterization of  $\text{Mn}_3\text{O}_4$  nano-layers stored in petri dishes for (a-c) 87 and (d-f) 442 days. Dynamic contact angle measurements of  $\text{Mn}_3\text{O}_4$  nano-layers stored in petri dishes for (g) 87 and (h) 442 days.
